# Supplementary material for: Copper: Synthesis Techniques in Nanoscale and Powerful Application as an Antimicrobial Agent
Source: Hindawi journal article supplement (doi:10.1155/2015/415238), 2015-01-01

- **Graphic abstract.** Cu nanoparticles synthesis, nanoparticle formation, possible interaction with the cell components, dies cell.

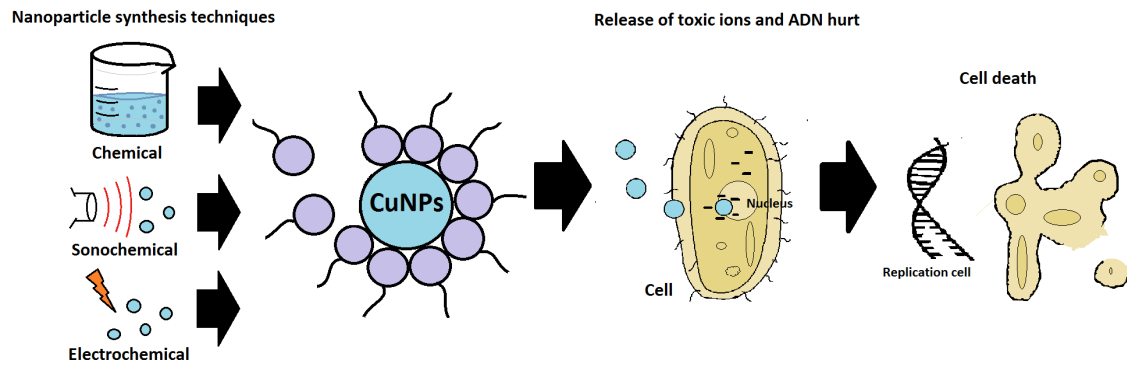

Supplement: f1 [file 415238.f1.pdf]
